# Supplementary material for: Fluorescent Molecularly Imprinted Polymer Sensor Prepared Using Mesoporous Silica as Carrier for Sensitive and Accurate Detection of Bisphenol A
Source: Research Square preprint supplement (doi:10.21203/rs.3.rs-8074508/v1), 2025-12-05
Supplement: Supplementary file 1 [file e1172db97d435781a0186389.docx]

**Supporting information**

**Fluorescent Molecularly Imprinted Polymer** **Sensor Prepared Using Mesoporous Silica as Carrier for** **Sensitive and Accurate Detection of Bisphenol A**

Yanming Shao a[[1]](#footnote-1)*, Xuan Rong a, Huanhuan Zhao a, Huanran Feng b, Wenli Ma a, Wenli Peng a, Guohao Gao a, Xianyu Yang a, Ziwei Jiao a

*a College of Chemistry and Chemical Engineering, Key Laboratory of Auxiliary Chemistry and Technology for Chemical Industry, Ministry of Education, Shaanxi Key Laboratory of Chemical Additives for Industry, Shaanxi University of Science and Technology, Xi’an, Shaanxi 710021, People’s Republic of China*

*b Interdisciplinary Research Center of Smart Sensors, Key Laboratory of Artificial Olfaction of Shaanxi Higher Education Institutes, Shaanxi Key Laboratory of High-Orbits-Electron Materials and Protection Technology for Aerospace, School of Advanced Materials and Nanotechnology, Xidian University, Shaanxi, 710126, People’s Republic of China*

**Details of figures**

**Fig. S1** Schematic illustration of the synthesis of (propargyl 4-cyanopentanate) dithiobenzoate

**Fig. S2** Schematic illustration of the synthesis of N-allyl-4-ethylenediamine-1, 8-naphthalimide

**Fig. S3** 1H NMR spectra of 3-azidopropyltriethoxysilane

**Fig. S4** 1H NMR Spectra of (4-cyanopentanoic acid) dithiobenzoate

**Fig. S5** 1H NMR spectra of (propargyl 4-cyanopentanate) dithiobenzoate

**Fig. S6** 1H NMR Spectra of N-Allyl-1, 8-naphthalimide

**Fig. S7** 1H NMR spectra of N-allyl-4-ethylenediamine-1, 8-naphthalimide

**Fig. S8** STEM image (A) and C, N, O, Si S element distribution maps of FMIP

**Fig. S9** Excitation spectra (a, c) and emission spectra (b, d) of N-allyl-4-ethylenediamine-1, 8-naphthalimide and FMIP

**Fig. S10** UV absorption spectra of BPA (a) and fluorescence emission spectra of N-allyl-4-ethylenediamine-1, 8-naphthalimide (b) (A). Schematic diagrams for N-allyl-4-ethylenediamine-1, 8-naphthalimide fluorescence quenching mechanism (B) and molecular orbital theory (C)


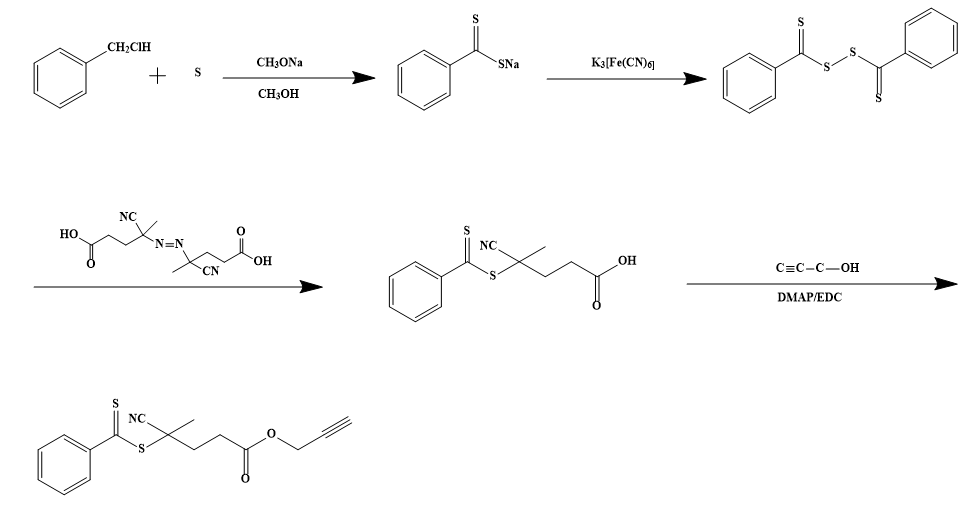


**Fig. S1** Schematic illustration of the synthesis of (propargyl 4-cyanopentanate) dithiobenzoate

**
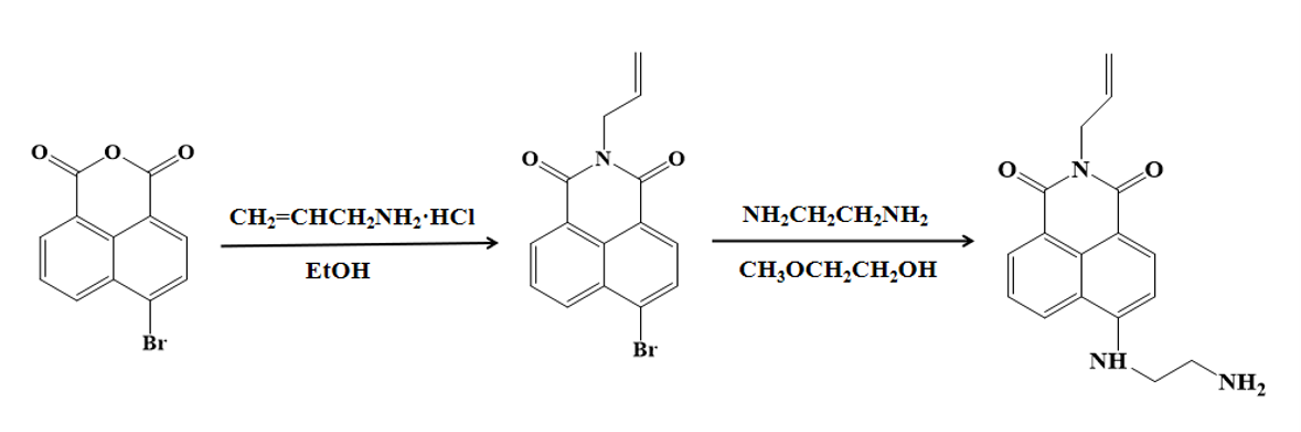
**

**Fig. S2** Schematic illustration of the synthesis of N-allyl-4-ethylenediamine-1, 8-naphthalimide


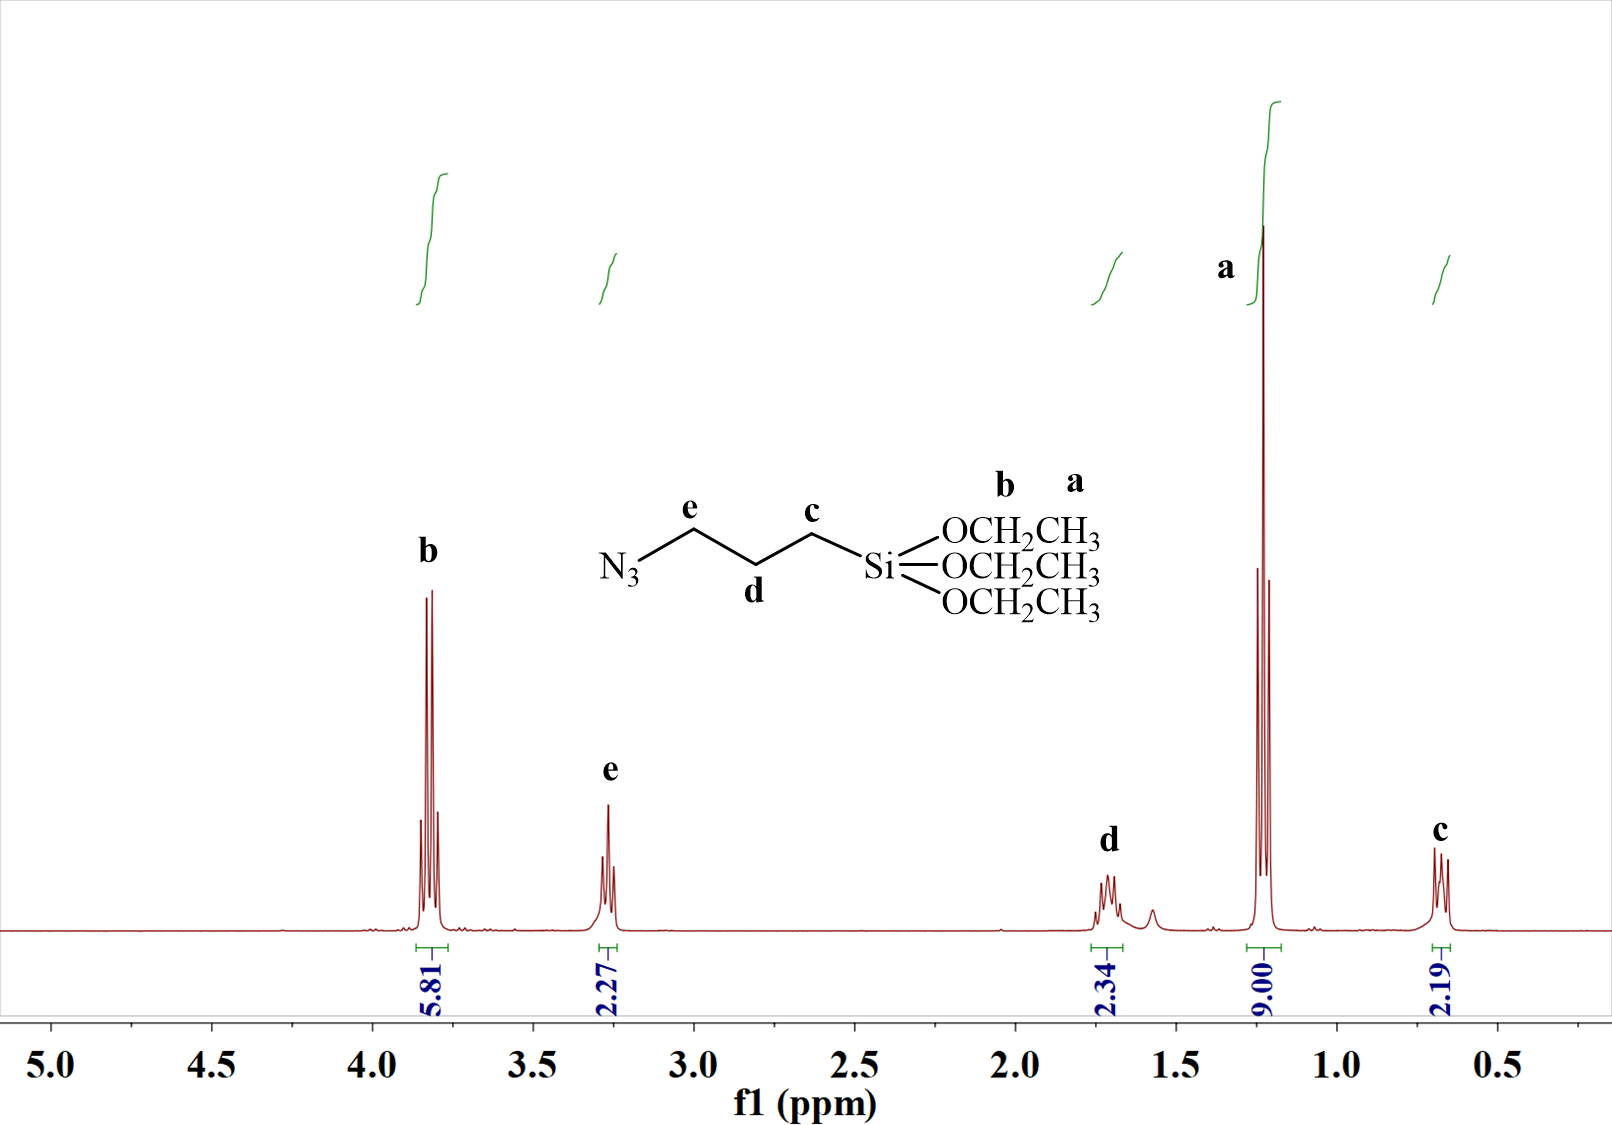


**Fig. S3** 1H NMR spectra of 3-azidopropyltriethoxysilane

3-azidopropyltriethoxysilane: 1H NMR (400 MHz, CDCl3) δ 3.82 (q, J = 7.0 Hz, 6H), 3.27 (m, J = 7.0 Hz, 2H), 1.76 ~ 1.67 (m, 2H), 1.23 (t, J = 7.0 Hz, 9H), 0.70 ~ 0.65 (m, 2H).


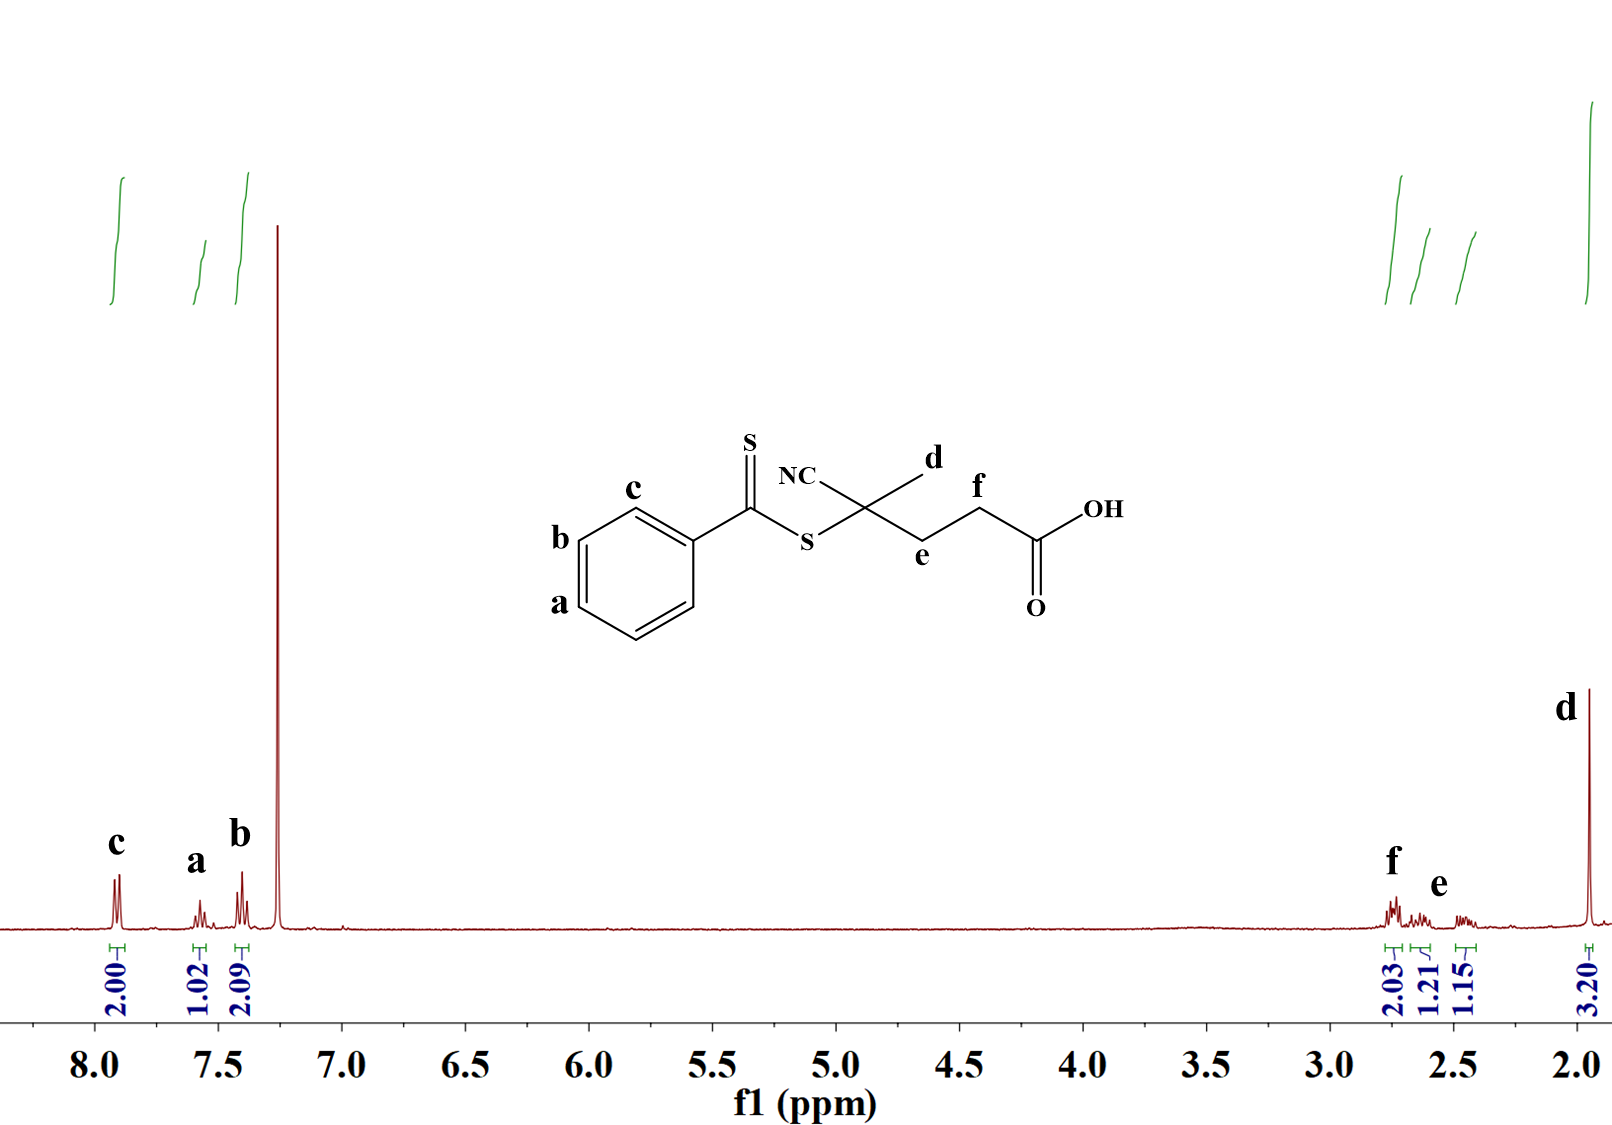


**Fig. S4** 1H NMR Spectra of (4-cyanopentanoic acid) dithiobenzoate

(4-cyanopentanoic acid) dithiobenzoate: 1H NMR (400 MHz, CDCl3) δ 7.95 ~ 7.88 (m, 2H), 7.57 (t, J = 7.5 Hz, 1H), 7.40 (t, J = 7.8 Hz, 2H), 2.74 (dt, J = 8.8, 5.6 Hz, 2H), 2.68 ~ 2.60 (m, 1H), 2.49 ~ 2.40 (m, 1H), 1.95 (s, 3H).


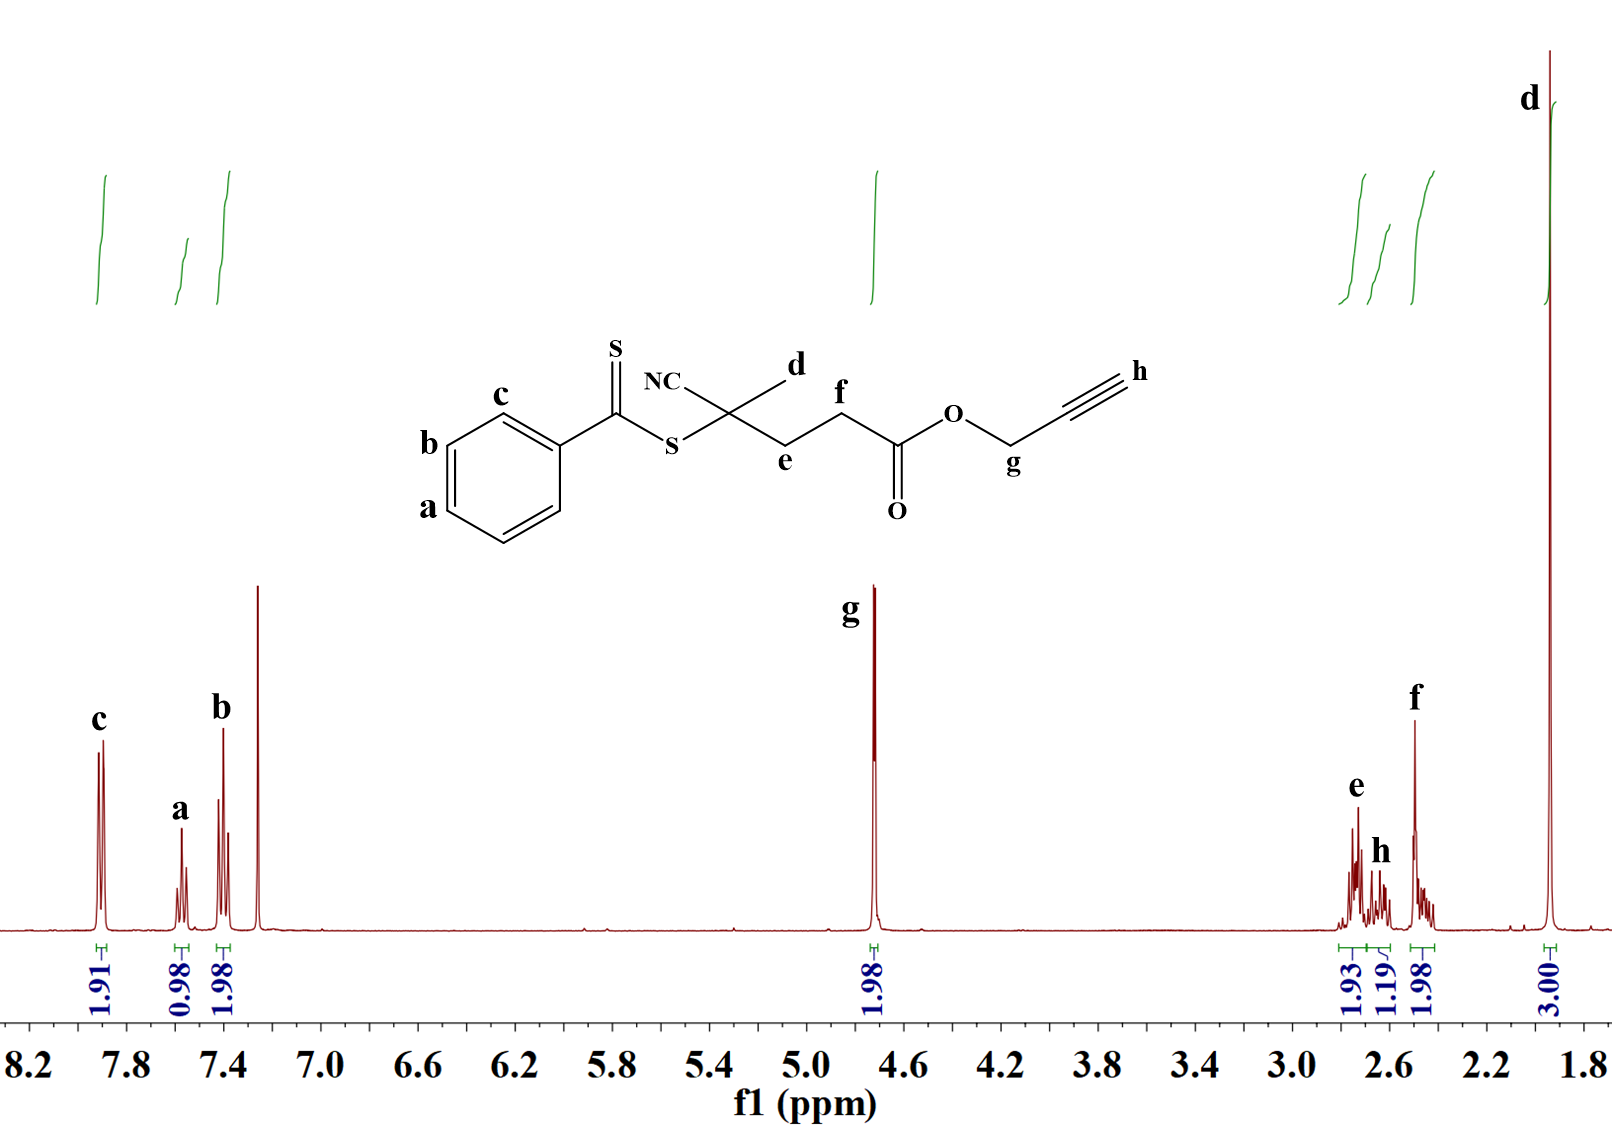


**Fig. S5** 1H NMR spectra of (propargyl 4-cyanopentanate) dithiobenzoate

(propargyl 4-cyanopentanate) dithiobenzoate: 1H NMR (400 MHz, CDCl3) δ 7.92 ~ 7.88 (m, 2H), 7.60 ~ 7.54 (m, 1H), 7.43 ~ 7.37 (m, 2H), 4.72 (d, J = 2.4 Hz, 2H), 2.81 ~ 2.70 (m, 2H), 2.69 ~ 2.60 (m, 1H), 2.51 ~ 2.41 (m, 2H), 1.94 (s, 3H).


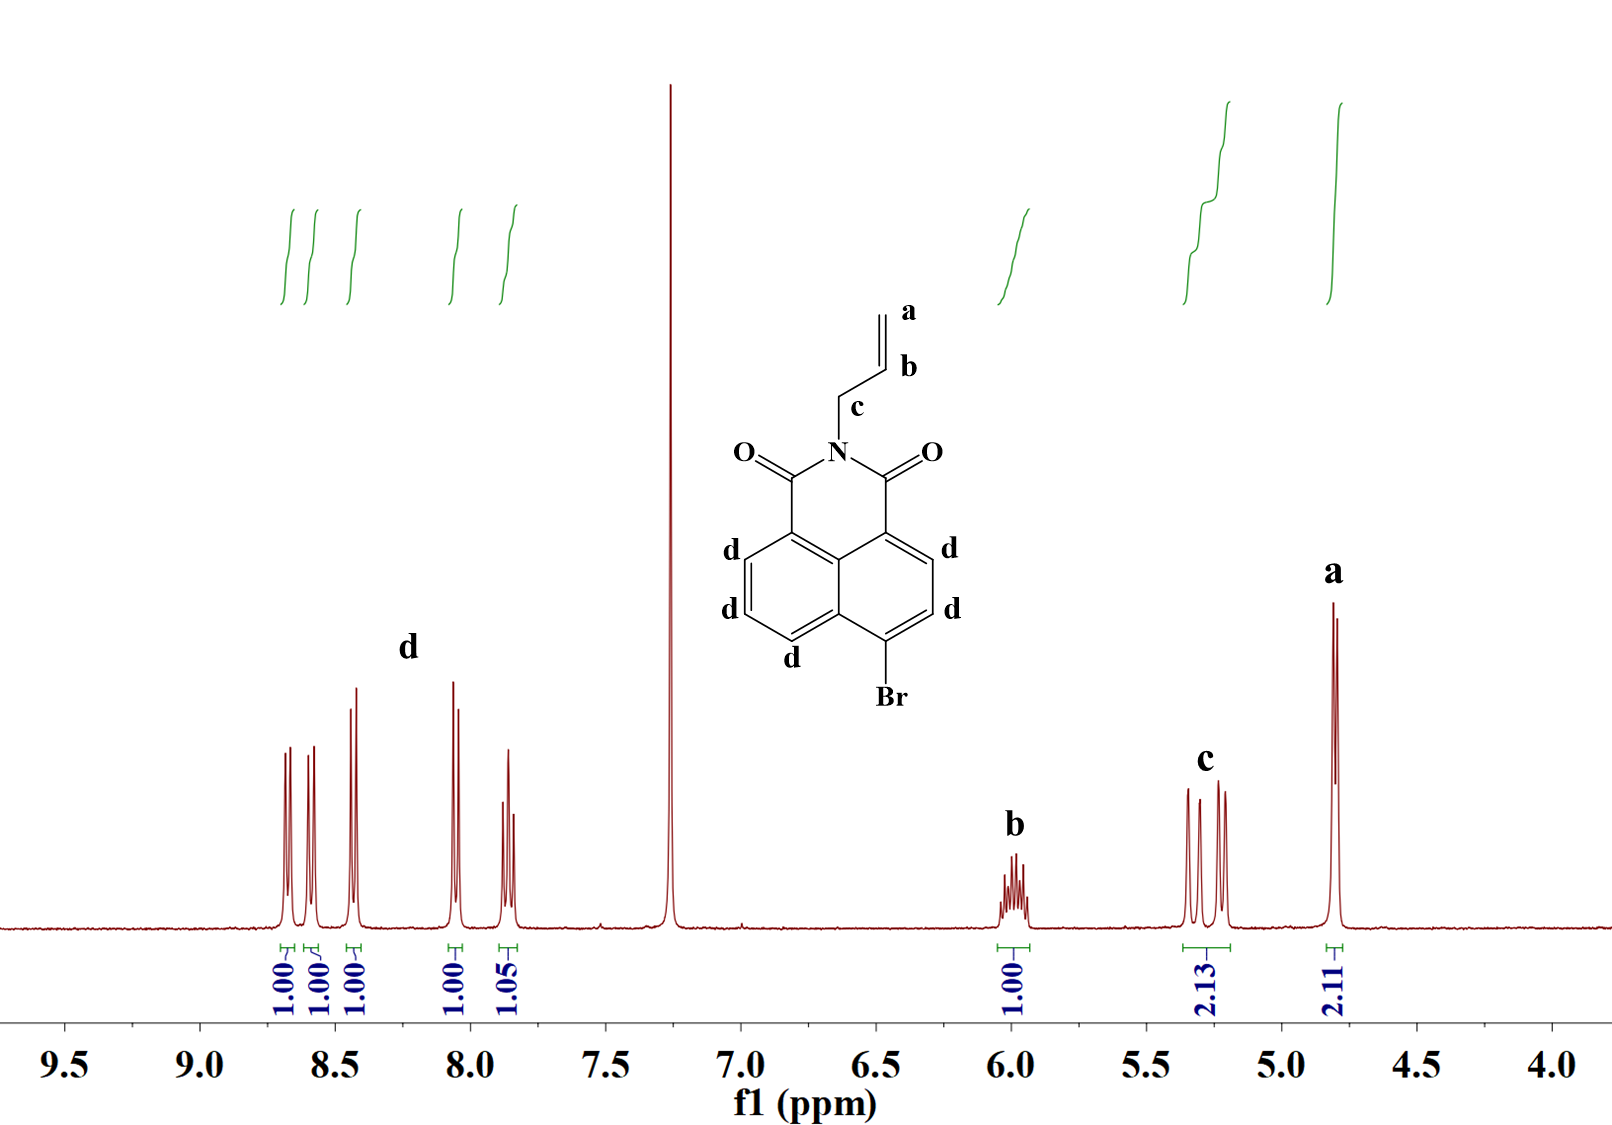


**Fig. S6** 1H NMR Spectra of N-Allyl-1, 8-naphthalimide

N-Allyl-1, 8-naphthalimide: 1H NMR (400 MHz, CDCl3) 8.68 (dd, J = 7.3, 1.1 Hz, 1H), 8.59 (d, J = 8.5 Hz, 1H), 8.43 (d, J = 7.9 Hz, 1H), 8.05 (d, J = 7.9 Hz, 1H), 7.86 (dd, J = 8.5, 7.3 Hz, 1H), 5.99 (ddt, J = 16.2, 11.3, 5.7 Hz, 1H), 5.37 ~ 5.19 (m, 2H), 4.80 (dt, J = 5.7, 1.5 Hz, 2H).


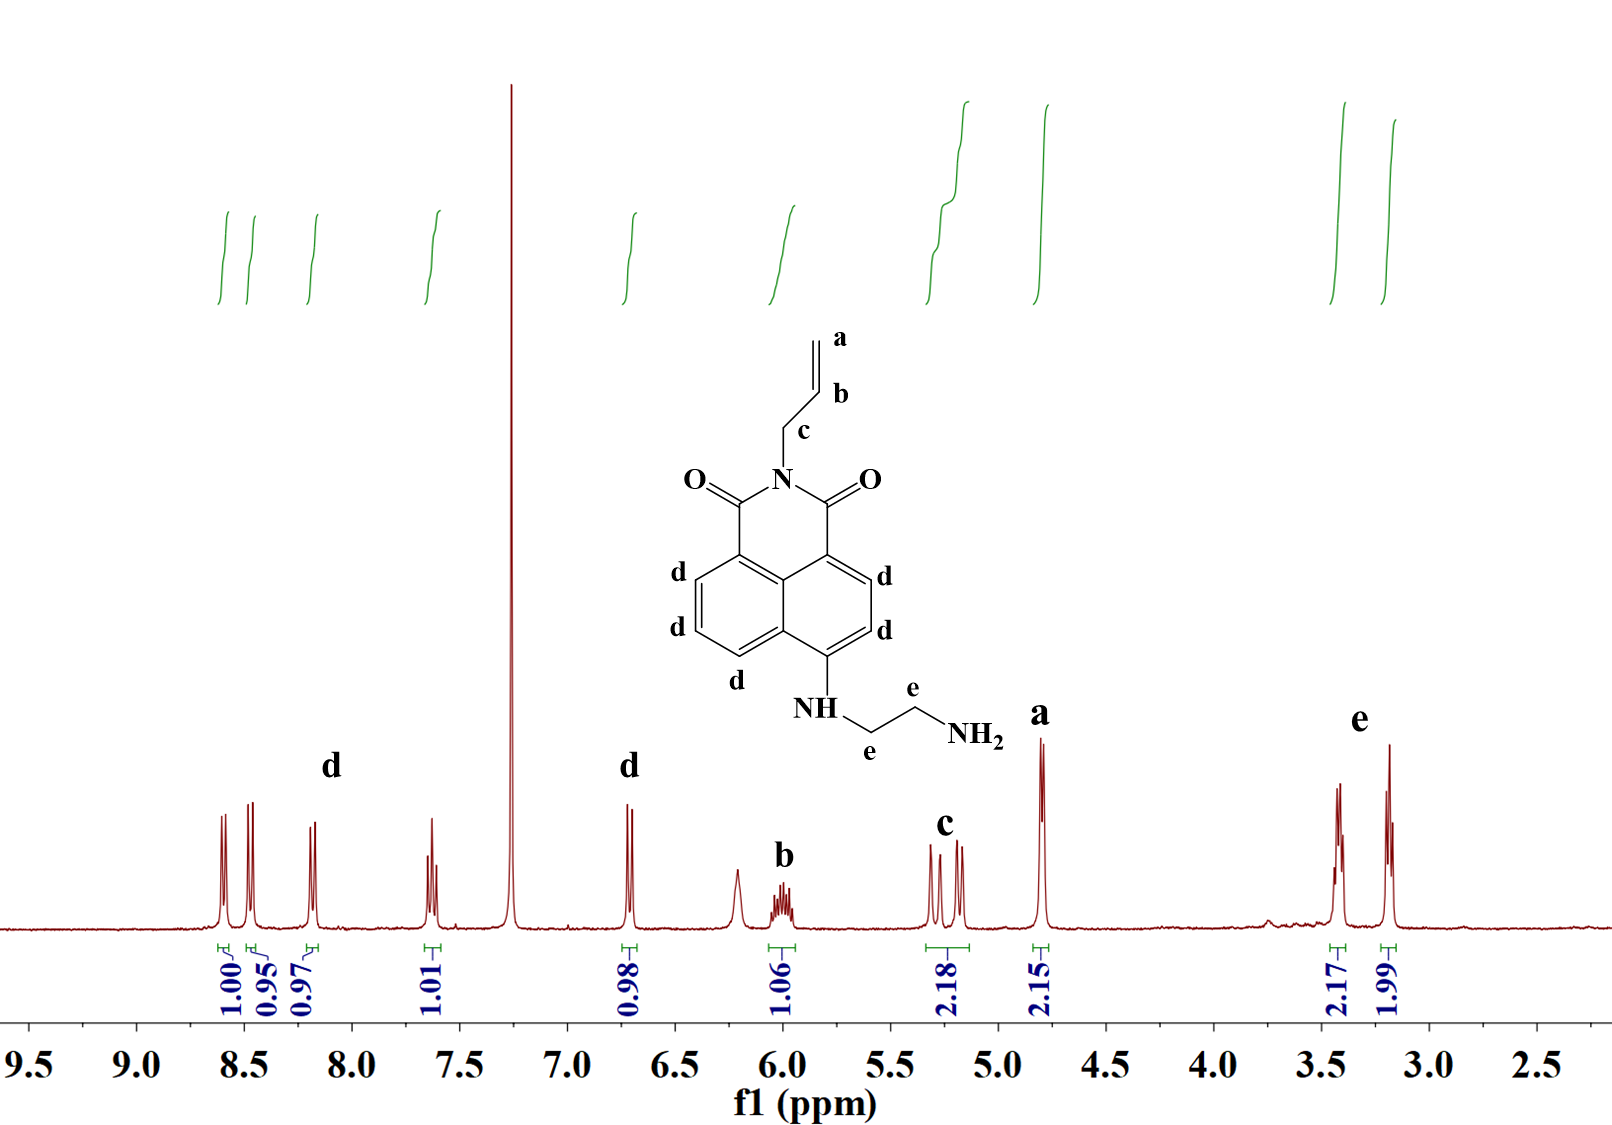


**Fig. S7** 1H NMR spectra of N-allyl-4-ethylenediamine-1, 8-naphthalimide

N-Allyl-4-ethylenediamine-1, 8-naphthalimide: 1H NMR (400 MHz, CDCl3) 8.60 (d, J = 7.3 Hz, 1H), 8.47 (d, J = 8.4 Hz, 1H), 8.18 (d, J = 8.4 Hz, 1H), 7.63 (t, J = 7.9 Hz, 1H), 6.71 (d, J = 8.4 Hz, 1H), 6.01 (ddt, J = 16.1, 10.7, 5.6 Hz, 1H), 5.34 ~ 5.13 (m, 2H), 4.80 (d, J = 5.4 Hz, 2H), 3.42 (q, J = 5.3 Hz, 2H), 3.18 (t, J = 5.8 Hz, 2H)


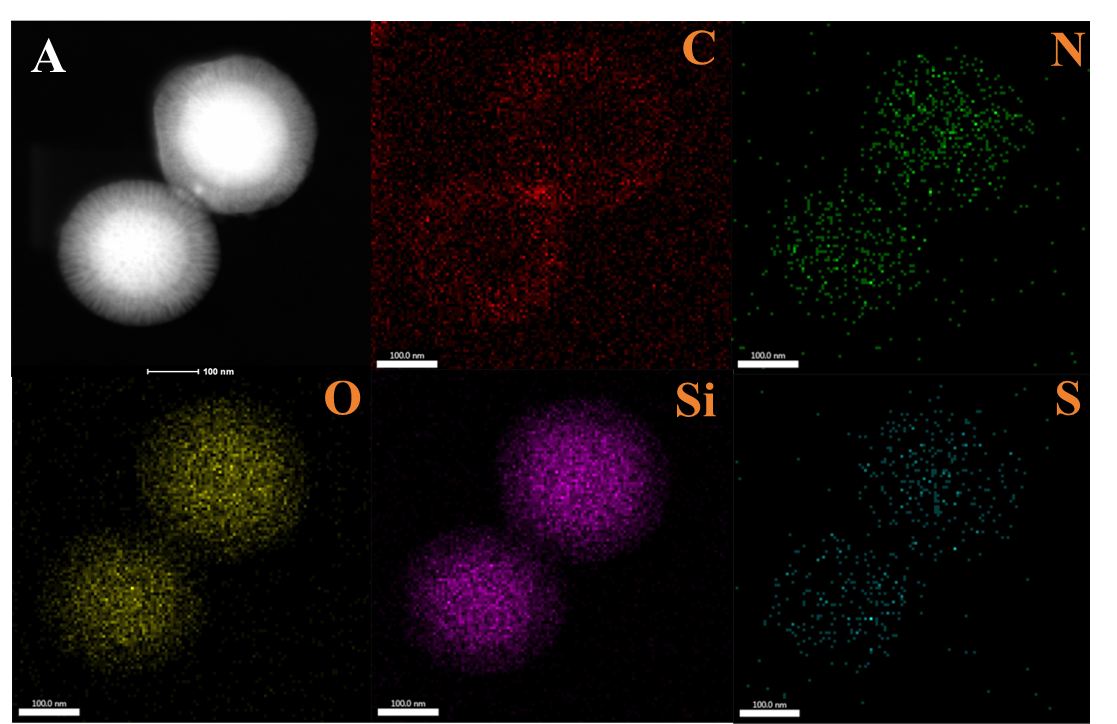


**Fig. S8** STEM image (A) and C, N, O, Si S element distribution maps of FMIP





**Fig. S9** Excitation spectra (a, c) and emission spectra (b, d) of N-allyl-4-ethylenediamine-1, 8-naphthalimide and FMIP


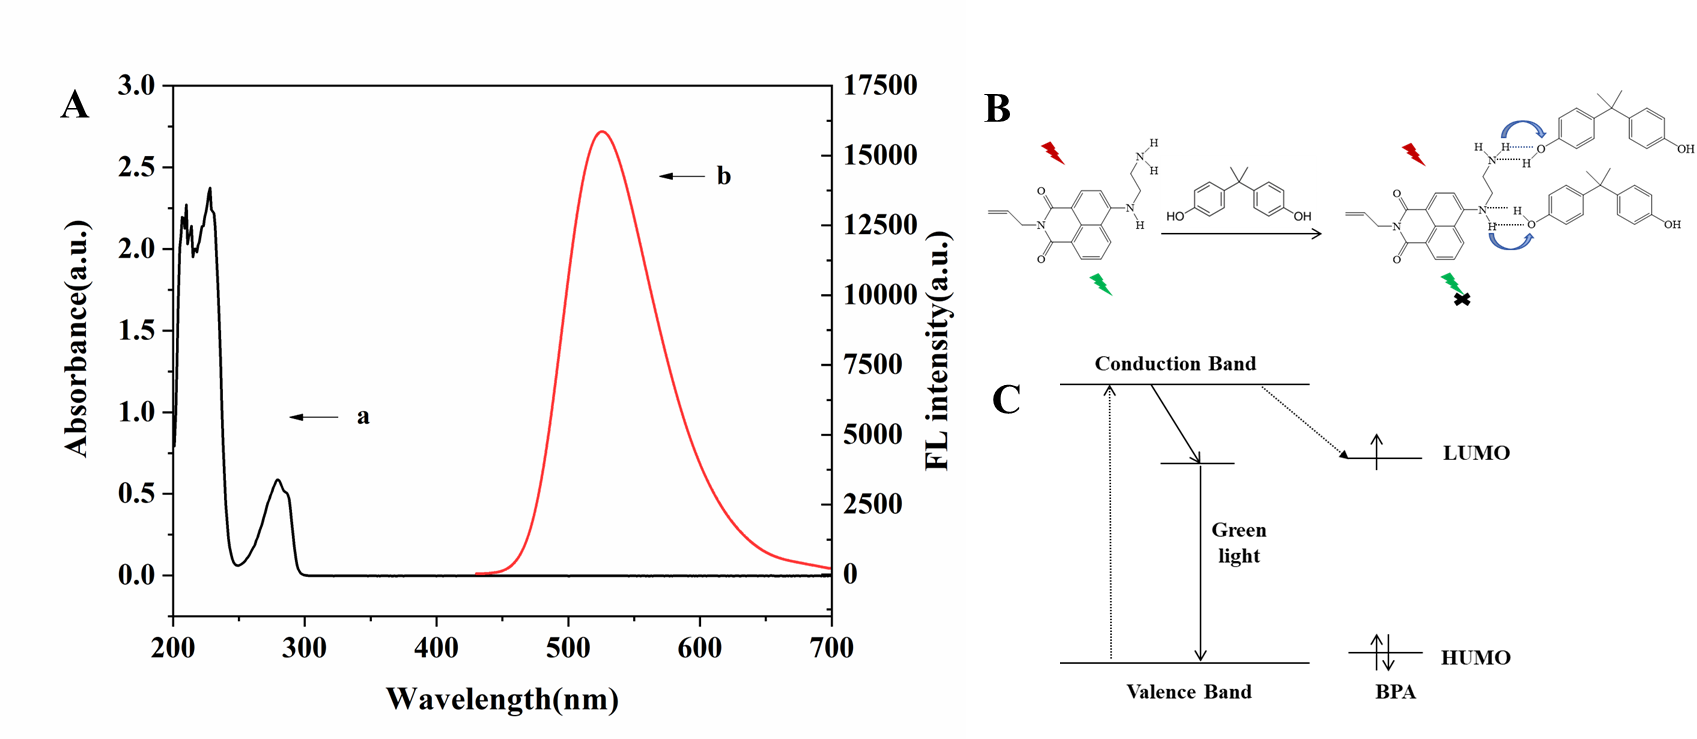


**Fig. S10** UV absorption spectra of BPA (a) and fluorescence emission spectra of N-allyl-4-ethylenediamine-1, 8-naphthalimide (b) (A). Schematic diagrams for N-allyl-4-ethylenediamine-1, 8-naphthalimide fluorescence quenching mechanism (B) and molecular orbital theory (C)

1. *Corresponding author. E-mail: shaoyanming@sust.edu.cn [↑](#footnote-ref-1)
